## The effect of body mass index on clinical outcomes in patients with newly diagnosed atrial fibrillation in the GARFIELD-AF registry

C.J.F. Camm<sup>1</sup>, A.J. Camm<sup>2</sup>, S. Virdone<sup>3</sup>, J.-P. Bassand<sup>4</sup>, D.A. Fitzmaurice<sup>5</sup>, K.A.A. Fox<sup>6</sup>, S.Z. Goldhaber<sup>7</sup>, S. Goto<sup>8</sup>, S. Haas<sup>9</sup>, A.G.G. Turpie<sup>10</sup>, F.W.A. Verheugt<sup>11</sup>, F. Misselwitz<sup>12</sup>, G. Kayani<sup>3</sup>, K.S. Pieper<sup>3</sup>, A.K. Kakkar<sup>13</sup>

<sup>1</sup>University of Oxford, Oxford, United Kingdom; <sup>2</sup>St George's University of London, Cardiology Clinical Academic Group Molecular & Clinical Sciences Research Institute, London, United Kingdom; <sup>3</sup>Thrombosis Research Institute, London, United Kingdom; <sup>4</sup>Thrombosis Research Institute, London, UK and University of Besançon, Besançon, France; <sup>5</sup>University of Warwick, Coventry, United Kingdom; <sup>6</sup>University of Edinburgh, Edinburgh, United Kingdom; <sup>7</sup>Brigham and Women's Hospital, Harvard Medical School, Boston, United States of America; <sup>8</sup>Tokai University School of Medicine, Kanagawa, Japan; <sup>9</sup>Technical University of Munich, Formerly Department of Medicine, Munich, Germany; <sup>10</sup>McMaster University, Hamilton, Canada; <sup>11</sup>Onze Lieve Vrouwe Gasthuis (OLVG), Amsterdam, Netherlands (The); <sup>12</sup>Bayer AG, Berlin, Germany; <sup>13</sup>Thrombosis Research Institute and University College London, London, United Kingdom

On behalf of GARFIELD-AF Investigators

**Funding Acknowledgement:** Type of funding source: Private company. Main funding source(s): The GARFIELD-AF registry is funded by an unrestricted research grant from Bayer AG.

**Introduction:** Higher body mass index (BMI) is associated with a higher risk of atrial fibrillation (AF). However, previous evidence has suggested an inverse association between BMI and risk of AF outcomes.

**Purpose:** To explore the association between BMI and outcomes in those with newly diagnosed AF in the GARFIELD-AF registry.

**Methods:** GARFIELD-AF is an international registry of consecutively recruited patients aged  $\geq 18$  years with newly diagnosed AF and  $\geq 1$  stroke risk factor. Data were collected prospectively on 52,080 patients. Participants with missing or extreme BMI values and those without two-year follow-up were excluded. Cox proportional hazard models were used to estimate the effect of BMI on the risk of outcomes. Models were adjusted for age, sex, ethnicity, smoking, alcohol, and  $\geq$  moderate chronic kidney disease. Where appropriate participants were divided into groups based on BMI. Restricted cubic splines were used to assess non-linear relationships.

**Results:** BMI and outcome data were available for 40,495 patients. Those

with higher BMI were generally younger, and more likely to have pre-existing hypertension, diabetes, or vascular disease (Table). Underweight patients received anticoagulation less often than those in other groups (60.3% vs 67.9%, respectively). During follow-up, 2,801 participants (6.9%) died and 603 (1.5%) had new/worsening heart failure. Following adjustment for potential confounders, a U-shaped relationship was seen between BMI and all-cause mortality and new/worsening heart failure (Figure). For all-cause mortality, the lowest risk was at 30kg/m<sup>2</sup>. Below this level, there was an 8% higher risk of mortality (95% confidence interval (CI) 6 to 9%) per 1kg/m<sup>2</sup> lower BMI. Above 30kg/m<sup>2</sup>, there was a 5% higher risk of mortality per 1kg/m<sup>2</sup> higher BMI (95% CI 4 to 7%). For new/worsening heart failure, the lowest risk was at 25kg/m<sup>2</sup>. Above this level, 1kg/m<sup>2</sup> higher BMI was associated with an 5% higher risk (95% CI 13 to 6%).

**Conclusions:** BMI was an important risk factor for both all-cause mortality and new/worsening heart failure in AF. Those at both extremes of BMI are at higher risk.

Baseline characteristics

|                         | Underweight (<18.5kg/m <sup>2</sup> ) | Normal (18.5 to <25kg/m <sup>2</sup> ) | Overweight (25 to <30kg/m <sup>2</sup> ) | Obese (30 to <35kg/m <sup>2</sup> ) | Very Obese ( $\geq 35$ kg/m <sup>2</sup> ) | p value |
|-------------------------|---------------------------------------|----------------------------------------|------------------------------------------|-------------------------------------|--------------------------------------------|---------|
| Participants            | 703                                   | 13098                                  | 15050                                    | 7564                                | 4080                                       |         |
| Male, n (%)             | 275 (39.1)                            | 7230 (55.2)                            | 9281 (61.7)                              | 4199 (55.5)                         | 1907 (46.7)                                | <0.001  |
| Age, median (IQR)       | 77 (68–84)                            | 73 (64–80)                             | 71 (62–78)                               | 69 (61–76)                          | 66 (59–73)                                 | <0.001  |
| Diabetes, n (%)         | 69 (9.8)                              | 2099 (16.0)                            | 3192 (21.2)                              | 2240 (29.6)                         | 1591 (38.9)                                | <0.001  |
| Vascular Disease, n (%) | 147 (21.0)                            | 2961 (22.8)                            | 3881 (25.9)                              | 2182 (29.0)                         | 1106 (27.3)                                | <0.001  |
| Hypertension, n (%)     | 388 (55.2)                            | 8946 (68.3)                            | 11820 (78.5)                             | 6494 (85.9)                         | 3602 (88.3)                                | <0.001  |

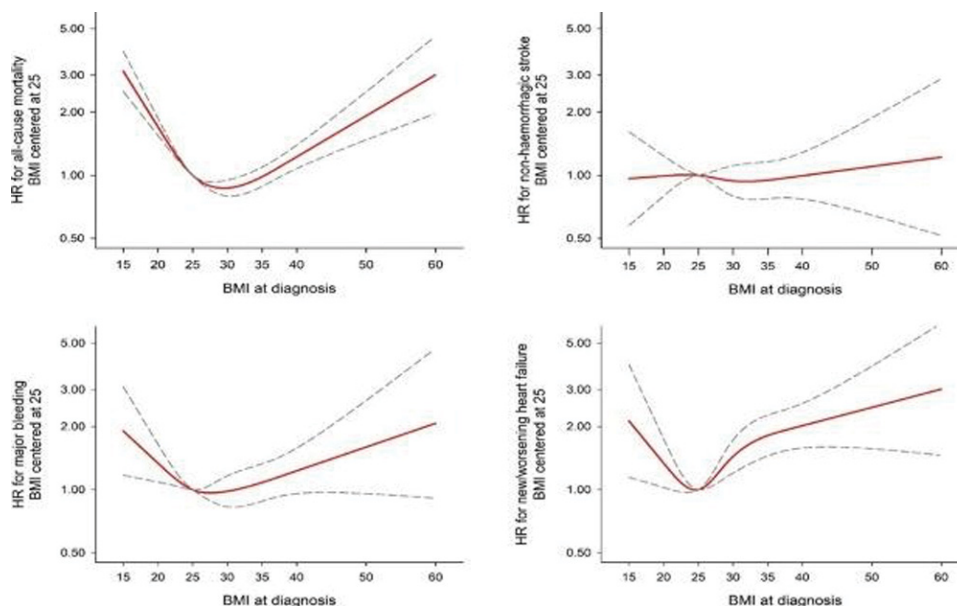

BMI and selected outcomes
